# Supplementary material for: Molecular stratification of metastatic melanoma using gene expression profiling : Prediction of survival outcome and benefit from molecular targeted therapy
Source: PubMed Central journal article supplement (PMC4494939; doi:10.18632/oncotarget.3655), 2015-03-26
Supplement: oncotarget-06-12297-s001.pdf [file oncotarget-06-12297-s001.pdf]

# **Molecular stratification of metastatic melanoma using gene expression profiling - prediction of survival outcome and benefit from molecular targeted therapy**

## **SUPPLEMENTARY MATERIALS AND METHODS**

### *Tumor specimens and RNA isolation*

Tissues from melanoma tumors ( $n = 219$ ) were obtained from the Department of Oncology at Lund University. After surgical removal of the tumors, all biopsies were snap frozen in liquid nitrogen and further stored at ultra-low temperature for later experimental use. Frozen tissues were homogenized using a TissueLyser (Qiagen) and DNA and RNA extracts were isolated using the AllPrep kit (Qiagen). To confirm good RNA quality, all extracts were analyzed on an Agilent Bioanalyzer 2100 (Agilent) and only samples with a RIN value larger than 6 was included in the study. DNA from blood samples was extracted using the DNeasy Blood and Tissue kit (Qiagen).

### *Preparation and hybridization*

Total RNA was converted to cDNA, biotin-labeled cRNA and finally hybridized to 50-mer probes on HumanHT-12 v4.0 Expression BeadChips (Illumina) according to Illumina's assay guide for Direct Hybridization Whole-Genome Expression assays. After washing and staining steps, the BeadChips (12 arrays of 47323 probes in each) were scanned using iScan.

### *Gene expression analysis and profiling*

Initial preprocessing of the data was executed using the GenomeStudio software (Illumina), which included removal of outlier beads and calculation of average bead signals and detection p-values. Data normalization was performed using the algorithm for cubic spline quantile-normalization [1]. Further processing was done using the R statistical software. Briefly, the data was log<sub>2</sub> transformed and probes with a detection

p-value <0.01 were kept if present in minimum 80% of the samples. Of the 13955 probes retained, 13744 probes corresponded to RefSeq features. These RefSeq features mapped to 11051 unique genes and the most varying probe for each gene was kept in the data. In order to compare gene expression levels across samples, the 11051 probes were mean centered. The centroids from Harbst et al. was used to classify the samples into any of the four recently identify melanoma subtypes [2]. In detail, the nearest centroid classification was used to classify a sample according to the maximum correlation of the sample with the four centroids (Pearson's correlation > 0.2, otherwise set as "unclassified").

#### *Network construction and module expression*

A gene co-expression network was created based on correlations between the genes in the data set and five modules of highly connected genes were extracted [3]. Briefly, the initial network was created by connecting nodes (genes) by edges (representing correlations) using a correlation cutoff of 0.6 and only including genes with five or more neighbors. Based on gene ontology analysis and published associations with melanoma-specific tumor biology, the five modules were further entitled as: the microphthalmia-associated transcription factor (MITF) module, including genes such as *MITF*, *MLANA*, *SILV*, *CDK2* and *ETV5*; the cell cycle module, containing genes related to the M phase, such as *CCNB2* and *CENPF*; the stroma module consisting of extracellular matrix-related genes; the immune response module representative of genes enrolled in tumor infiltrating lymphocyte and antigen presentation; and finally also an interferon module consisting of genes responsive of interferon treatment. The resulting gene expression landscape consisting of 394 genes scattered around the five core modules was visualized in Cytoscape (Figure 1B) [4]. Module activity scores were

calculated for all samples, *i.e.* mean expression values of all genes representing the particular modules.

#### *SureSelect deep targeting sequencing*

Target enrichment design, library preparation and data processing were performed as previously described [5]. Briefly, 1697 frequently mutated cancer-associated genes were selected based on information in the COSMIC database and in the literature to create the SureSelect target enrichment design (5.5 MB coverage by 120 bp-long tiling probes). DNA samples were sheared, end-repaired and given a unique adapter (sample specific barcode) before PCR-amplification. The adapter-ligated fragments were subjected to target enrichment (SureSelect, Agilent), PCR-amplification and sequencing according to Illumina Paired-End Sequencing Library Protocol on a HighSeq2000.

#### *Principal component analysis (PCA)*

PCA was used to assess that the variation in the gene expression data was due biological factors and not systematic experimental artifacts. Briefly, PCA functions by reducing the dimensionality of the data by extracting principal components (PCs), *i.e.* uncorrelated linear vectors further explaining the variation in the data [6]. The PCs are then tested for association with the biological and technical variables to elucidate their impact on the variation in the data. We performed PCA by using the *swamp* package in R [7]. Results are shown as a heatmap of the associations between PCs and sample annotations (Figure S4).

### *Immunohistochemistry (IHC)*

A subset of the melanoma tumors (n = 59), representing the four major gene expression phenotypes, was selected for immunohistochemistry. After formalin-fixed paraffin-embedding, sections (4  $\mu$ m) were captured and prepared according to standard procedures. Staining was performed using antibodies against MITF (clone: C5, Thermo Fisher), cluster of differentiation 3 (CD3; polyclonal, DAKO) and Ki67 (clone: MIB-1, DAKO), together with the DAKO Envision horseradish peroxidase rabbit/mouse kit system and the Dakocytomation Autostainer (DAKO). Further more, sections were also stained with hematoxylin and eosin (HE) to see structural patterns in the tumor tissues.

### *Validation sets*

TCGA RNAseqv2 level 3 data (release 3.1.14.0, 2015-01-28), comprising 20,501 genes from 472 primary and metastatic samples (barcodes '01' and '06'), was downloaded in the form of normalized RSEM count estimates ('\*rsem.genes.normalized\_results' files). The data was quantile-normalized between samples using limma [8], given an offset of 32, capped at 65,000, log-transformed and median-centered over genes. As described in the above section "*Gene expression analysis and profiling*", samples were classified into any of the four melanoma subtypes using the nearest centroid classification (Pearson's correlation > 0.1, otherwise set as "unclassified"). The 438 available centroid genes found in the data were monitored for batch effects using TCGA's technical annotations.

The gene expression phenotypes and their clinical relevance were evaluated in three independent external datasets obtained from the Gene Expression Omnibus (GEO) repository (GSE50509 [10]; GSE61992 [11]; GSE35640 [12]). In the first study, 21

patients were treated with the BRAF inhibitors (BRAFi) dabrafenib or vemurafenib and evaluated for best objective response (RECIST response, %), progression-free survival (PFS) and screened for resistance mechanisms [10]. In total, 50 specimens were being analyzed in this study including 21 pre-treatment tumors and 29 post-relapse tumors. In the second study, 10 patients were treated with a combination of BRAFi (dabrafenib) and the MEK inhibitor (MEKi) trametinib, and analyzed for similar endpoints as in the prior study. However, gene expression data was only available for 9 patients, thus including 19 specimens in total (9 pre-treatment tumors and 10 post-relapse tumors) [11]. In the third study, 56 patients were analyzed for a pre-treatment gene expression signature predictive of response to MAGE-A3 immunotherapeutic treatment and each patient were assigned a status of responder or non-responder [12].

Genome-wide gene expression microarray was performed using Illumina Human HT-12 v4 BeadChip arrays (Rizos' and Long's studies) and Affymetrix HG-U133.Plus 2.0 system (Ulloa-Montoya's study) [10, 12]. We performed similar preprocessing of the three already normalized datasets obtained from GEO including addition of a probe presence filter, log<sub>2</sub> transformation and KNN-imputation (the latter step was only performed in Rizos' and Long's data). In detail, for samples run on the Illumina platform, we removed probes when less than 80% of the samples had a detection p-value < 0.01, whereas in the Affymetrix data the cutoff was set to 0.1.

#### *Combining datasets using Distance Weighted Discrimination (DWD)*

DWD is a well-known classification method, which has also proven to be very useful in microarray datasets to compensate for systematic biases [13, 14]. Based on the findings that molecular portraits are conserved across platforms [15], we combined our dataset with the above external datasets and applied DWD adjustment before

performing nearest centroid classification. Initially, all external datasets were preprocessed as described in the above section “*Validation sets*” and pairwise analyzes were performed between our dataset and the external datasets (pairwise merging). Briefly, common centroid genes across the itemed datasets were extracted (Our/Rizos, 260 genes; Our/Long, 281 genes; Our/Ulloa-Montoya, 220 genes). Individual datasets (genes not mean centered) were combined and adjusted in a pairwise manner using the *InSilicoMerging* package in R calling the “DWD” method. The genes in the pairwise combined and adjusted data were mean centered across all the data and further classified. In order to check for remaining source biases, the data were visualized after DWD adjustment in a multidimensional scaling (MDS) plot (Figure S5) but also analyzed using hierarchical clustering to conclude sample dispersion in a source independent manner (results not shown).

### *Statistics*

All statistical analyzes were performed using R (two-sided tests). Fisher’s exact test and Kruskal-Wallis test were performed to compare gene expression phenotypes with clinical characteristics. All survival analyses were made using the *survival* package in R. In addition, we performed non-parametric Kruskal-Wallis tests to analyze the module activity scores against clinical characteristics.

### *Supplement text references*

1. Vallon-Christersson J, Nordborg N, Svensson M and Hakkinen J. BASE—2nd generation software for microarray data management and analysis. BMC bioinformatics. 2009; 10:330.
2. Harbst K, Staaf J, Lauss M, Karlsson A, Masback A, Johansson I, Bendahl PO, Vallon-Christersson J, Torngren T, Ekedahl H, Geisler J, Hoglund M, Ringner M, Lundgren L, Jirstrom K, Olsson H, et al. Molecular profiling reveals low- and high-grade forms of primary melanoma. Clin Cancer Res. 2012; 18(15):4026–4036.

3. Fredlund E, Staaf J, Rantala JK, Kallioniemi O, Borg A and Ringner M. The gene expression landscape of breast cancer is shaped by tumor protein p53 status and epithelial-mesenchymal transition. *Breast Cancer Res.* 2012; 14(4):R113.
4. Shannon P, Markiel A, Ozier O, Baliga NS, Wang JT, Ramage D, Amin N, Schwikowski B and Ideker T. Cytoscape: a software environment for integrated models of biomolecular interaction networks. *Genome research.* 2003; 13(11):2498-2504.
5. Harbst K, Lauss M, Cirenajwis H, Winter C, Howlin J, Torngren T, Kvist A, Nodin B, Olsson E, Hakkinen J, Jirstrom K, Staaf J, Lundgren L, Olsson H, Ingvar C, Gruvberger-Saal SK, et al. Molecular and genetic diversity in the metastatic process of melanoma. *The Journal of pathology.* 2014; 233(1):39-50.
6. Ringner M. What is principal component analysis? *Nature biotechnology.* 2008; 26(3):303-304.
7. Lauss M, Visne I, Kriegner A, Ringner M, Jonsson G and Hoglund M. Monitoring of technical variation in quantitative high-throughput datasets. *Cancer informatics.* 2013; 12:193-201.
8. Smyth GK. Linear models and empirical bayes methods for assessing differential expression in microarray experiments. *Statistical applications in genetics and molecular biology.* 2004; 3:Article3.
9. Jonsson G, Busch C, Knappskog S, Geisler J, Miletic H, Ringner M, Lillehaug JR, Borg A and Lonning PE. Gene expression profiling-based identification of molecular subtypes in stage IV melanomas with different clinical outcome. *Clin Cancer Res.* 2010; 16(13):3356-3367.
10. Rizos H, Menzies AM, Pupo GM, Carlino MS, Fung C, Hyman J, Haydu LE, Mijatov B, Becker TM, Boyd SC, Howle J, Saw R, Thompson JF, Kefford RF, Scolyer RA and Long GV. BRAF inhibitor resistance mechanisms in metastatic melanoma: spectrum and clinical impact. *Clin Cancer Res.* 2014; 20(7):1965-1977.
11. Long GV, Fung C, Menzies AM, Pupo GM, Carlino MS, Hyman J, Shahheydari H, Tembe V, Thompson JF, Saw RP, Howle J, Hayward NK, Johansson P, Scolyer RA, Kefford RF and Rizos H. Increased MAPK reactivation in early resistance to dabrafenib/trametinib combination therapy of BRAF-mutant metastatic melanoma. *Nature communications.* 2014; 5:5694.
12. Ulloa-Montoya F, Louahed J, Dizier B, Gruselle O, Spiessens B, Lehmann FF, Suci S, Kruit WH, Eggermont AM, Vansteenkiste J and Brichard VG. Predictive gene signature in MAG E-A3 antigen-specific cancer immunotherapy. *J Clin Oncol.* 2013; 31(19):2388-2395.
13. Benito M, Parker J, Du Q, Wu J, Xiang D, Perou CM and Marron JS. Adjustment of systematic microarray data biases. *Bioinformatics.* 2004; 20(1):105-114.
14. Huang H, Lu X, Liu Y, Haaland P and Marron JS. R/DWD: distance-weighted discrimination for classification, visualization and batch adjustment. *Bioinformatics.* 2012; 28(8):1182-1183.
15. Hu Z, Fan C, Oh DS, Marron JS, He X, Qaqish BF, Livasy C, Carey LA, Reynolds E, Dressler L, Nobel A, Parker J, Ewend MG, Sawyer LR, Wu J, Liu Y, et al. The molecular portraits of breast tumors are conserved across microarray platforms. *BMC genomics.* 2006; 7:96.

**Supplementary Table 1.** Gene symbols of the five melanoma network modules.

| Immune Response |            |             |            | Stroma | Cell cycle | MITF     | Interferon |         |
|-----------------|------------|-------------|------------|--------|------------|----------|------------|---------|
| ACSL5           | SLCO2B1    | IDO1 PRD    | TNFSF10 B  | PCSK5  |            | NEK2 AN  | RAB17 GP   | IFIT1 I |
| HLA-            | AIM2 PAP   | M1 DOCK2    | TG2 ARHGA  |        | ABI3BP CF  | LN PRC1  | R56 RAB3   | FIT3 IF |
| DRB4 SRGN       | LN GIMAP   | NCKAP1L     | P25 CD74 S | H      |            | CCNB2 C  | 8 D4S234   | I44 IFI |
| CXCL16 FC       | 2 ITGB2 C  | HAVCR2 A    | TAT1 DENN  |        | PDPN PDL   | DC20 MA  | E IRF4 RO  | T2 IFI2 |
| N1              | YSLTR1 F   | IF1 PSMB9   | D2D AMICA  | IM1    |            | D2L1 CE  | PN1B ERB   | 7 IFI44 |
| LST1 ARH        | UCA1 RAS   | FPR3        | 1          |        | FNDC1 CO   | NPF PBK  | B3 ATP1A   | L IFI6  |
| GAP9 EPST       | AL3 SLAM   | IGJ KYN     | ADAMDEC1   | L6A2   |            | CDC45L C | 1 SLC7A5   |         |
| I1 HCG4 G       | F6 IFI30 G | U CCL4L     | SKAP1      |        | CDH11 MF   | KS2 NCA  | ETV5 CHC   |         |
| VIN1            | IMAP5 CX   | 2 IRF1      | HLA-       | AP5    |            | PG       | HD6 LYST   |         |
| C2 CCL4         | CR4 PIK3   | SLC1A3      | DPA1 RARR  |        | NUAK1 PO   |          | MITF IGS   |         |
| L1              | AP1 CFB    | BASP1 C     | ES3 GMFG   | DN     |            |          | F11 CAPN   |         |
| GLRX            | CD52 CY    | D2 CD38     | SYK PPP1R  |        | APLNR PR   |          | 3 MLANA    |         |
| HLA-            | BB LBH     |             | 16B RASGR  | ICKLE1 |            |          | MLPH CD    |         |
| DMA FYB         | HCST AB    | CCDC109B    | P1 SERPINA |        | F13A1 LR   |          | K2         |         |
| HLA-            | CG1 ALO    | FLI1 PSCDB  | 1 RBM47 CC | RC32   |            |          | PIR ROPN   |         |
| E MFNG          | X5 GZMK    | P CSF1R MS  | ND2 APOBE  |        | ECSCR EB   |          | 1 SNCA C   |         |
| GZMA FG         | TRIM22     | 4A7 CD69    | C3G C1QA G | F1     |            |          | ABLES1 S   |         |
| R FGD2 B        | CD37 LP    | GBP2 G      | IMAP6 GIM  |        | COL3A1 C   |          | LC45A2 P   |         |
| IRC3 FCG        | XN         | PR34        | AP7 HLA-   | D34    |            |          | PM1H       |         |
| R1A NAP         | PLCG2 CXC  | CD7 CCL19   | DQB1 HLA-  |        | SMOC2 GU   |          | SILV INP   |         |
| SB SLAM         | L13 HLA-   | CAMK1G FC   | DPB1 TNFA  | CY1A3  |            |          | P4B        |         |
| F8              | DQA1 PRKC  | GR1B CD86   | IP8 LY86   |        | PLAC9 GL   |          |            |         |
| RFTN1 IL2R      | B1 RAC2    | TMEM176A    | GBP4 D     | T8D2   |            |          |            |         |
| B APOL3 CS      | PLEK SP    | TNFSF13B G  | HRS9 L     |        | EFNB2 EG   |          |            |         |
| T7 ARHGAP       | INT2 EV    | PR65 KLRB1  | YZ         | FLAM   |            |          |            |         |
| 30 PIM2 CE      | I2A LMO    | IGLL1 SNOR  | HLA-       |        | FABP4 CO   |          |            |         |
| BPA HCP5 F      | 2 CD163    | D13 CTSS IN | DOA PIK3I  | L6A3   |            |          |            |         |
| ERMT3 SLA       | TLR7 H     | PP5D        | P1 FOLR2   |        | CXCR7 TC   |          |            |         |
| APBB11P LI      | LA-B       | EVL HCLS    | GBP5       | F4     |            |          |            |         |
| ME1 DOCK8       | RARRES1    | 1 GIMAP1    | SPI1 CCL   |        | CD36 C1Q   |          |            |         |
| CRKRS ITGA      | GIMAP4 CD  | IGLL3 CD    | 2 MS4A6    | TNF5   |            |          |            |         |
| X SIGLEC14      | 8A SERPIN  | 53 CD3D     | A CD79B    |        | CCL14 C1   |          |            |         |
| PLA2G7 RA       | G1 HLA-    | FCER1G G    | GLIPR1 ST  | R      |            |          |            |         |
| SGRP3 PTG       | DRB3 GLIP  | BP1 MS4     | X11 EB12   |        | COLEC12    |          |            |         |
| ER4 GRAP L      | R2 TNFRSF  | A4A PTPN    | ARHGDIB I  | PALMD  |            |          |            |         |
| APTM5 IKZ       | 1B LTB LA  | 6 CD79A     | L32 TBXA   |        | PODXL IG   |          |            |         |
| F1 CD247 G      | MP3 FGD3   | EVI2B SE    | S1 CCL5 M  | FBP6   |            |          |            |         |
| ZMB PIK3C       | FGL2 ST    | L1L3 IGSF   | AP4K1 CT   |        | GPX3 COL   |          |            |         |
| G CORO1A C      | AT4 GIM    | 6 SLC15A    | SH         | 1A2    |            |          |            |         |
| LEC4A LAT2      | AP8 IL7R   | 3 NKG7 C    | HLA-       |        | LRIG1 IGF  |          |            |         |
|                 |            | D48 MMP     | DRA PSCD   | BP4    |            |          |            |         |
| BTK CECR        | KCNMA1     | 9 C1QC LC   | 4 ALOX5A   |        | MXRA5 CR   |          |            |         |
| 1 C1QB PR       | HLA-       | P1 SLC40    | P SEMA4D   | ISPLD2 |            |          |            |         |
| KCH ECGF        | DMB SPOC   | A1 LYN      |            |        | LEPR COL   |          |            |         |
| 1 SIGLEC1       | K2 SLC7A7  | HLA-F       | SH2D1A     | 12A1   |            |          |            |         |
| 0 AKNA IR       | CXCL9 CD   |             |            |        | CD248 CO   |          |            |         |
| F8              | 14 ICAM2   |             |            | L15A1  |            |          |            |         |
|                 | NCF1 ITM   |             |            |        | PDGFRL S   |          |            |         |
|                 | 2A IL18BP  |             |            | PARC   |            |          |            |         |
|                 |            |             |            |        | SULF2 EP   |          |            |         |
|                 |            |             |            | AS1    |            |          |            |         |
|                 |            |             |            |        | COL5A2 D   |          |            |         |
|                 |            |             |            | CN     | F3         |          |            |         |
|                 |            |             |            | BGN    |            |          |            |         |
|                 |            |             |            |        | CLEC3B FB  |          |            |         |
|                 |            |             |            | LN1    |            |          |            |         |
|                 |            |             |            |        | CDH5 SFR   |          |            |         |
|                 |            |             |            | P2     |            |          |            |         |
|                 |            |             |            |        | OLFML2B    |          |            |         |
|                 |            |             |            | COL1A1 |            |          |            |         |



**Supplementary Table 2.** Gene expression phenotype-specific genetic events.

| Genetic events |                   | High-immune group | Pigmentation group | Proliferative group |
|----------------|-------------------|-------------------|--------------------|---------------------|
| <i>Gene</i>    | <i>Alteration</i> | <i>P*</i>         |                    |                     |
| <i>BRAF</i>    | mut               | 0.5               | 0.9                | 0.3                 |
| <i>NRAS</i>    | mut               | 0.4               | 0.6                | 1                   |
| <i>NF1</i>     | mut               | 1                 | 0.7                | 1                   |
| <i>KIT</i>     | mut/amp           | 1                 | 0.4                | 0.6                 |
| <i>CDKN2A</i>  | mut/del m         | 0.2               | 0.4                | 0.05                |
| <i>TP53</i>    | ut mut/de         | 1                 | 0.6                | 0.4                 |
| <i>PTEN</i>    | l mut             | 0.6               | 1                  | 0.4                 |
| <i>PIK3CA</i>  | mut mut           | 1                 | 0.1                | 0.1                 |
| <i>CTNNB1</i>  | mut/amp           | 0.1               | 0.02               | 0.7                 |
| <i>RB1</i>     | amp               | 0.2               | 0.1                | 1                   |
| <i>CDK4</i>    | amp               | 1                 | 0.7                | 1                   |
| <i>CCND1</i>   | amp               | 0.5               | 0.04               | 0.5                 |
| <i>MITF</i>    |                   | 0.3               | 0.04               | 0.6                 |
| <i>NOTCH2</i>  |                   | 1                 | 0.7                | 1                   |

\* P-values shown in the table were calculated using Fisher's exact test. Each gene expression phenotype was compared to a combined group of all other samples (excluding unclassified samples),  $n = 137$  samples in the analysis.

**Supplementary Table 3.** Survival outcome analysis in patients with regional metastatic disease; univariable Cox regression analysis of clinical parameters.

| Clinical parameters                       | Disease-specific survival <sup>1</sup> |      |           |        | Distant metastasis-free survival <sup>2</sup> |      |           |        |
|-------------------------------------------|----------------------------------------|------|-----------|--------|-----------------------------------------------|------|-----------|--------|
|                                           | Events/N                               | HR   | 95% CI    | P*     | Events/N                                      | HR   | 95% CI    | P*     |
| <b>Metastasis</b>                         |                                        |      |           |        |                                               |      |           |        |
| <i>Gender</i>                             | 51/125                                 |      |           |        | 72/125                                        |      |           |        |
| female                                    |                                        | 1.00 | Ref       | (0.02) |                                               | 1.00 | Ref       | (0.02) |
| male                                      |                                        | 2.2  | 1.13-4.11 | 0.02   |                                               | 1.9  | 1.13-3.17 | 0.02   |
| <i>Age (ys)</i>                           | 51/124                                 |      |           |        | 72/124                                        |      |           |        |
| <60                                       |                                        | 1.00 | Ref       | (0.05) |                                               | 1.00 | Ref       | (0.04) |
| ≥60                                       |                                        | 1.8  | 1.01-3.34 | 0.05   |                                               | 1.7  | 1.01-2.74 | 0.04   |
| <i>Metastasis type</i>                    | 48/118                                 |      |           |        | 68/118                                        |      |           |        |
| in-transit                                |                                        | 1.00 | Ref       | (0.03) |                                               | 1.00 | Ref       | (0.08) |
| regional                                  |                                        | 0.39 | 0.16-0.92 | 0.03   |                                               | 0.52 | 0.25-1.09 | 0.08   |
| <i>Site of metastasis</i>                 | 46/114                                 |      |           |        | 66/114                                        |      |           |        |
| subcutaneous                              |                                        | 1.00 | Ref       | (0.3)  |                                               | 1.00 | Ref       | (0.06) |
| lymph node                                |                                        | 0.64 | 0.25-1.62 | 0.3    |                                               | 0.51 | 0.25-1.03 | 0.06   |
| <i>Affected nodes</i>                     | 34/88                                  |      |           |        | 47/88                                         |      |           |        |
| ≤1                                        |                                        | 1.00 | Ref       | (0.2)  |                                               | 1.00 | Ref       | (0.4)  |
| >1                                        |                                        | 1.6  | 0.79-3.04 | 0.2    |                                               | 1.3  | 0.71-2.27 | 0.4    |
| <b>Previous primary tumor<sup>2</sup></b> |                                        |      |           |        |                                               |      |           |        |
| <i>Age (ys)</i>                           | 46/105                                 |      |           |        | 64/105                                        |      |           |        |
| <60                                       |                                        | 1.00 | Ref       | (0.2)  |                                               | 1.00 | Ref       | (0.2)  |
| ≥60                                       |                                        | 1.5  | 0.80-2.63 | 0.2    |                                               | 1.4  | 0.86-2.35 | 0.2    |
| <i>Breslow thickness (mm)</i>             | 45/101                                 |      |           |        | 63/101                                        |      |           |        |
| ≤1.0                                      |                                        | 1.00 | Ref       | (0.6)  |                                               | 1.00 | Ref       | (0.8)  |
| 1.01-2.0                                  |                                        | 0.63 | 0.24-1.62 | 0.3    |                                               | 0.88 | 0.38-2.04 | 0.8    |
| 2.01≤4.0                                  |                                        | 1.02 | 0.42-2.49 | 1.0    |                                               | 0.87 | 0.38-2.00 | 0.7    |
| >4.0                                      |                                        | 0.75 | 0.29-1.94 | 0.6    |                                               | 1.2  | 0.52-2.67 | 0.7    |
| <i>Clark level</i>                        | 36/81                                  |      |           |        | 53/81                                         |      |           |        |
| II                                        |                                        | 1.00 | Ref       | (0.8)  |                                               | 1.00 | Ref       | (0.8)  |
| IV                                        |                                        | 0.91 | 0.46-1.81 | 0.8    |                                               | 1.1  | 0.61-1.95 | 0.8    |
| <i>Histologic type</i>                    | 37/88                                  |      |           |        | 53/88                                         |      |           |        |
| unknown primary                           |                                        | 1.00 | Ref       | (0.2)  |                                               | 1.00 | Ref       | (0.3)  |
| SSM                                       |                                        | 2.2  | 0.73-6.45 | 0.2    |                                               | 2.2  | 0.80-5.78 | 0.1    |
| NM                                        |                                        | 1.3  | 0.44-3.97 | 0.6    |                                               | 2.0  | 0.78-5.25 | 0.1    |
| <i>Primary site</i>                       | 44/98                                  |      |           |        | 61/98                                         |      |           |        |
| trunk                                     |                                        | 1.00 | Ref       | (0.2)  |                                               | 1.00 | Ref       | (0.5)  |
| upper limbs                               |                                        | 0.58 | 0.24-1.42 | 0.2    |                                               | 0.63 | 0.29-1.37 | 0.2    |
| lower limbs                               |                                        | 0.57 | 0.29-1.11 | 0.1    |                                               | 0.83 | 0.48-1.43 | 0.5    |
| <i>Ulceration</i>                         | 18/50                                  |      |           |        | 30/50                                         |      |           |        |
| no                                        |                                        | 1.00 | Ref       | (0.5)  |                                               | 1.00 | Ref       | (0.3)  |
| yes                                       |                                        | 1.4  | 0.54-3.59 | 0.5    |                                               | 0.71 | 0.35-1.45 | 0.3    |

Abbreviations: NA, not available; SSM, superficial spreading melanoma; NM, nodular melanoma; CI, confidence interval; HR, hazard ratio.

<sup>1</sup> Follow up starts at disease progression and ends at melanoma-specific death (=event).

<sup>2</sup> Follow up starts at disease progression and ends at distant metastasis occurrence (=event).

\* P-values for the pairwise comparisons were calculated using the Wald-test. Overall P-values (also from the Wald-test) are given within the parentheses.

A

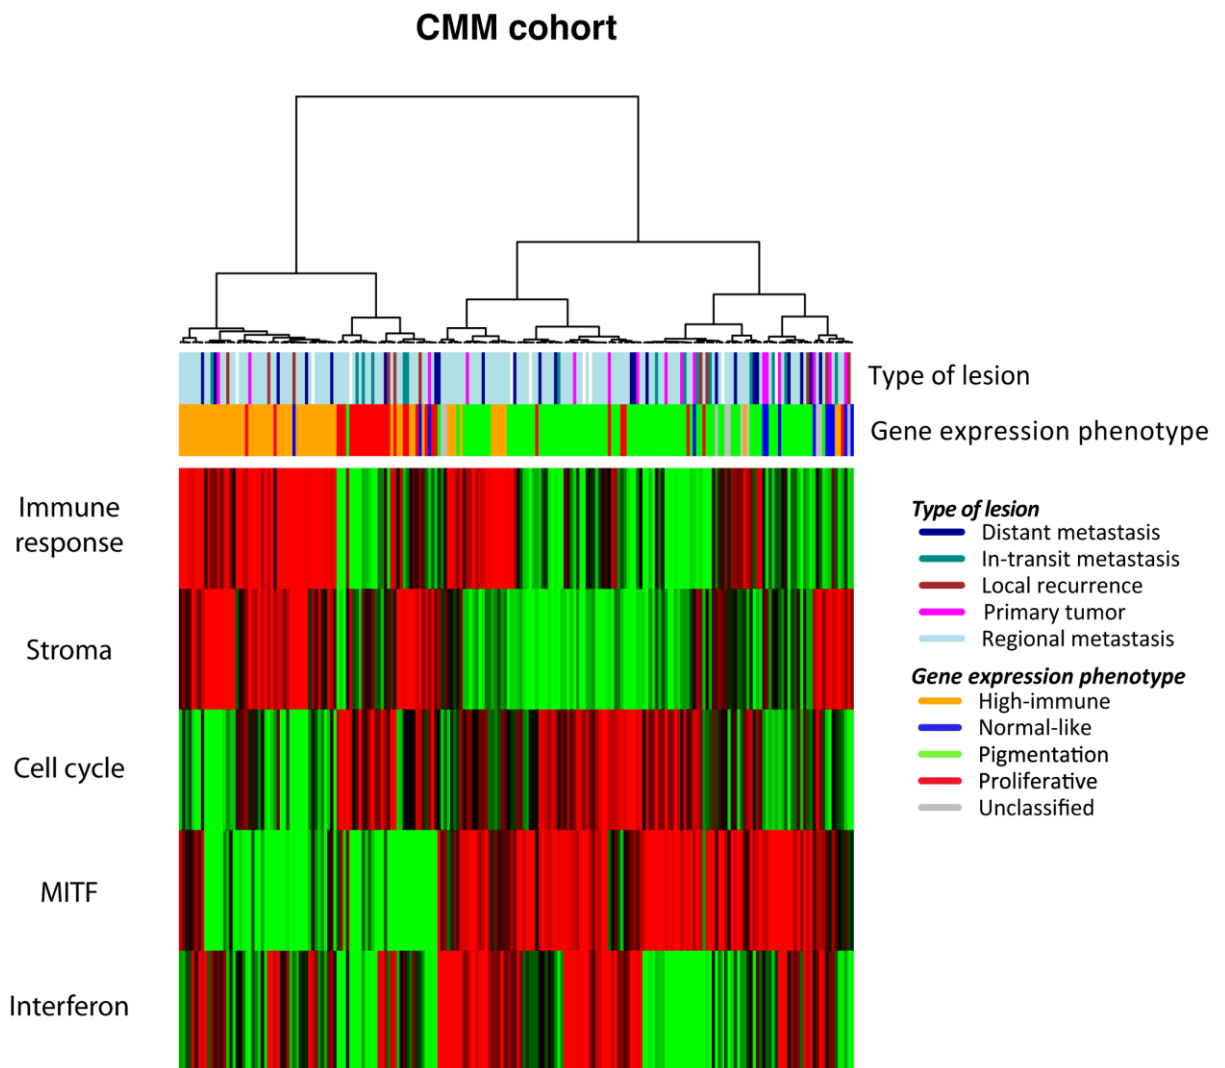

**B**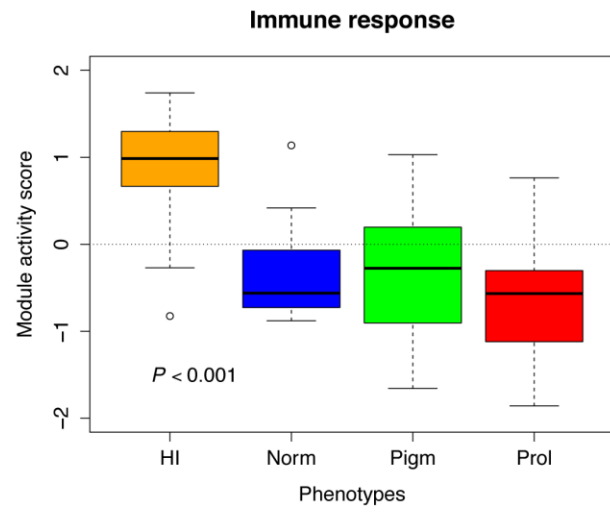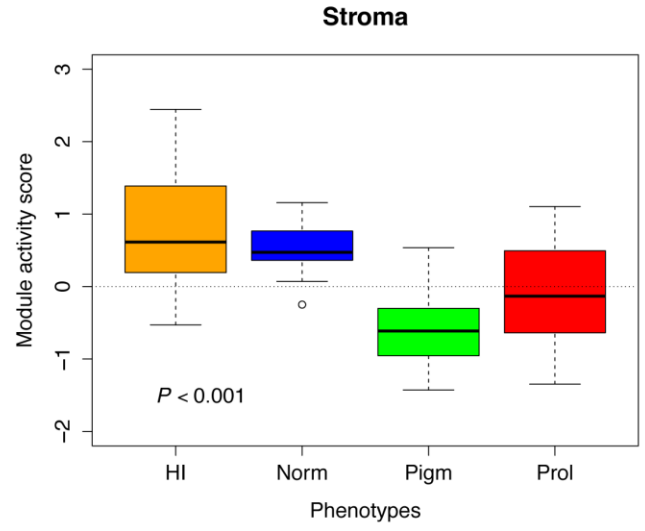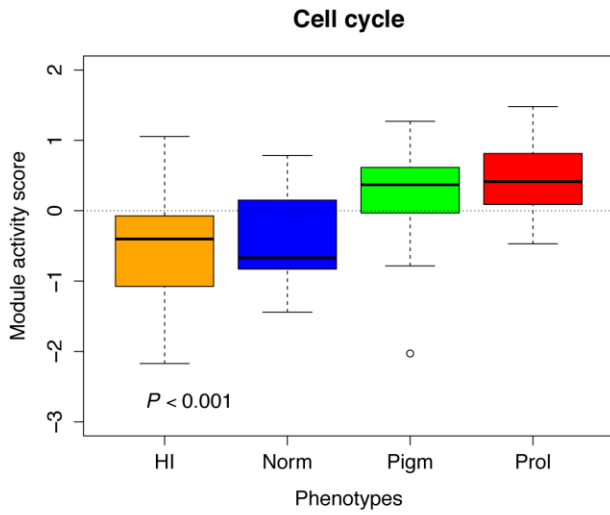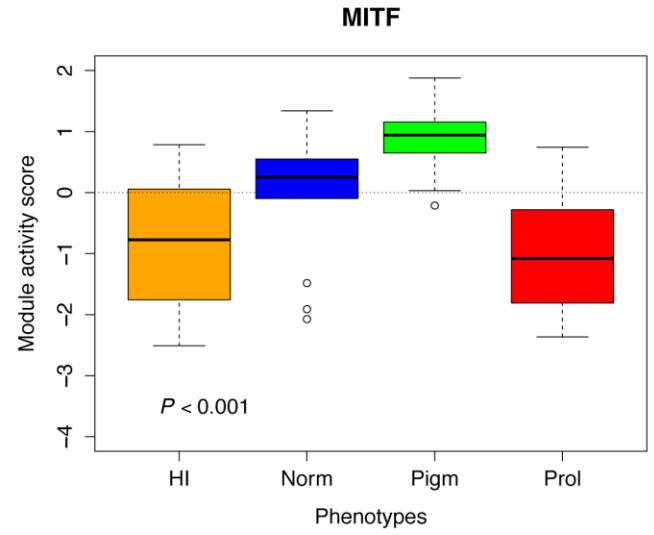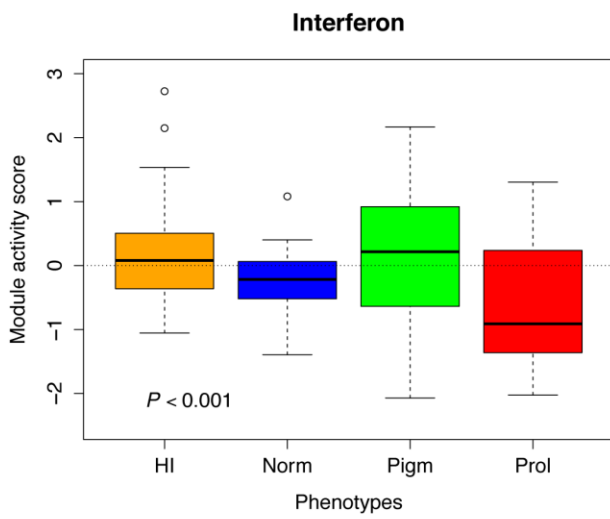

C

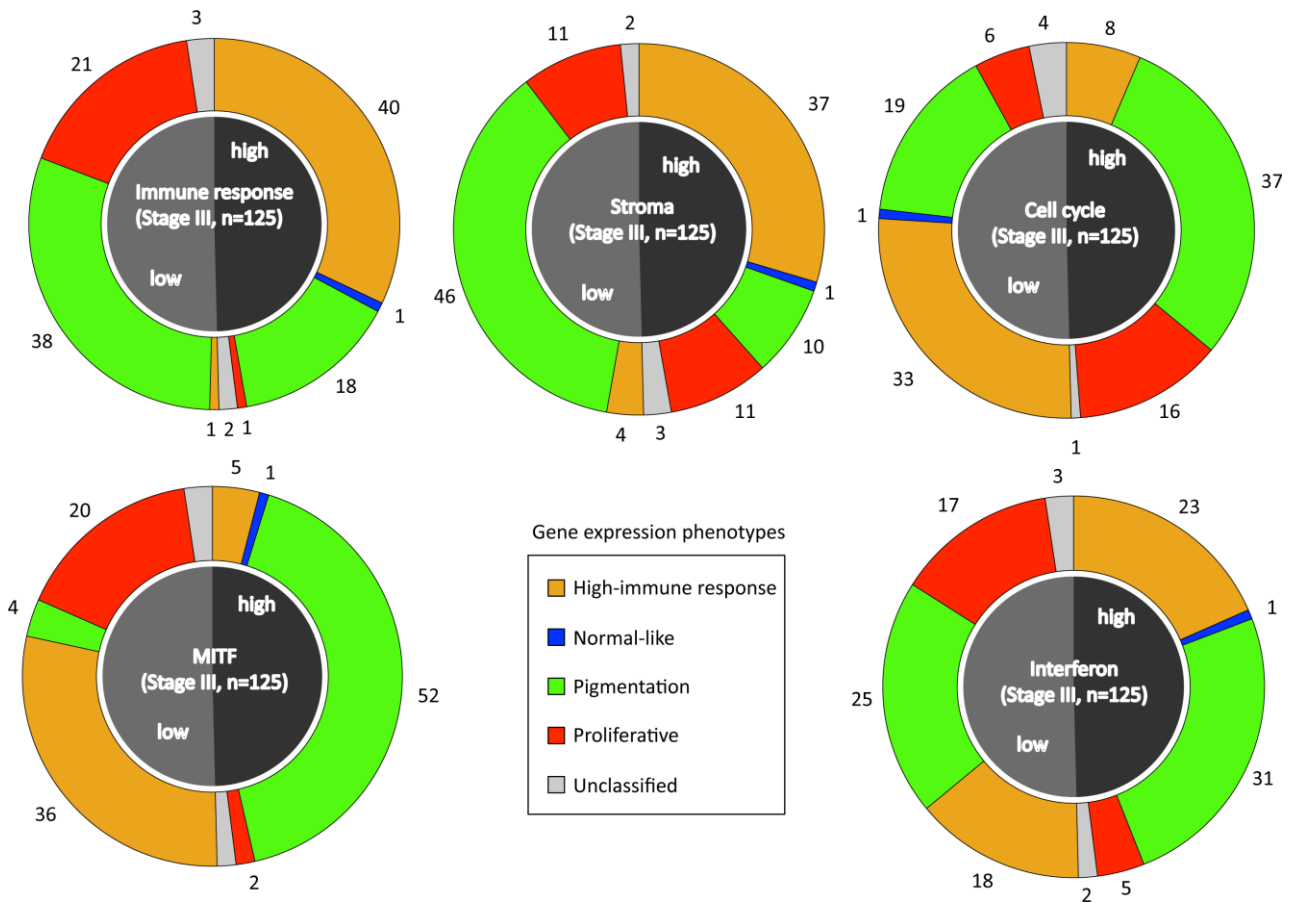

### Supplementary Figure 1

Correlation of the gene expression phenotypes with the network modules. A) Heatmap of tumor-specific module activity scores (rows) and samples (columns) ordered according to the gene expression phenotypes. Color bars indicate gene expression phenotypes and type of tumor lesion. B) Depiction of median module activity scores stratified by gene expression phenotype. C) Low and high network module groups and their association with the gene expression phenotypes.

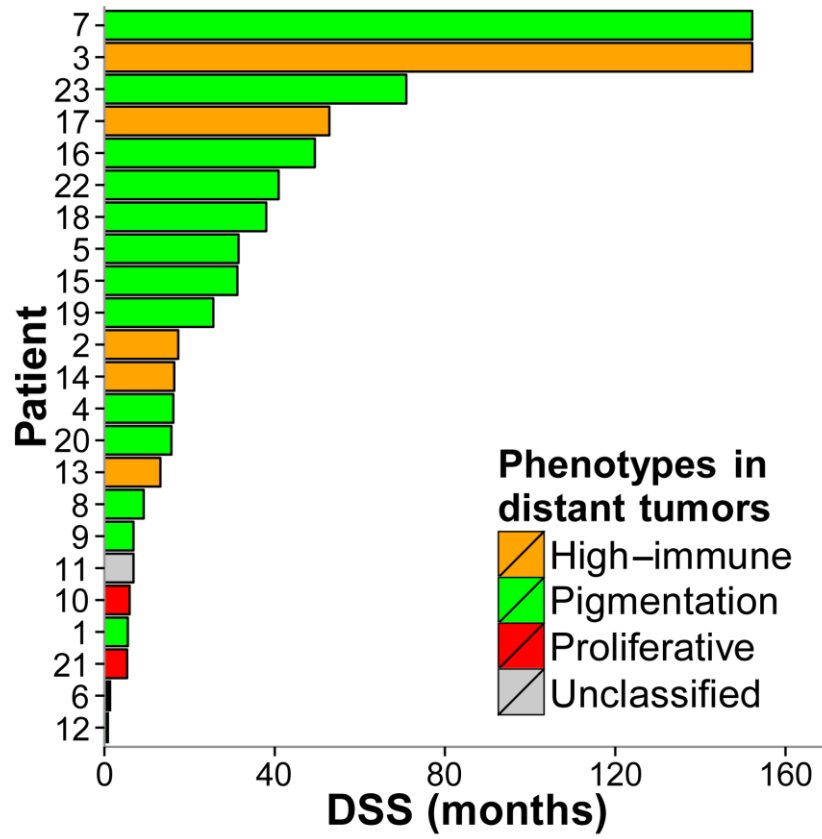

**Supplementary Figure 2**

Correlation of disease-specific survival (DSS) and assigned gene expression phenotypes in 23 stage IV melanoma patients with distantly spread metastases.

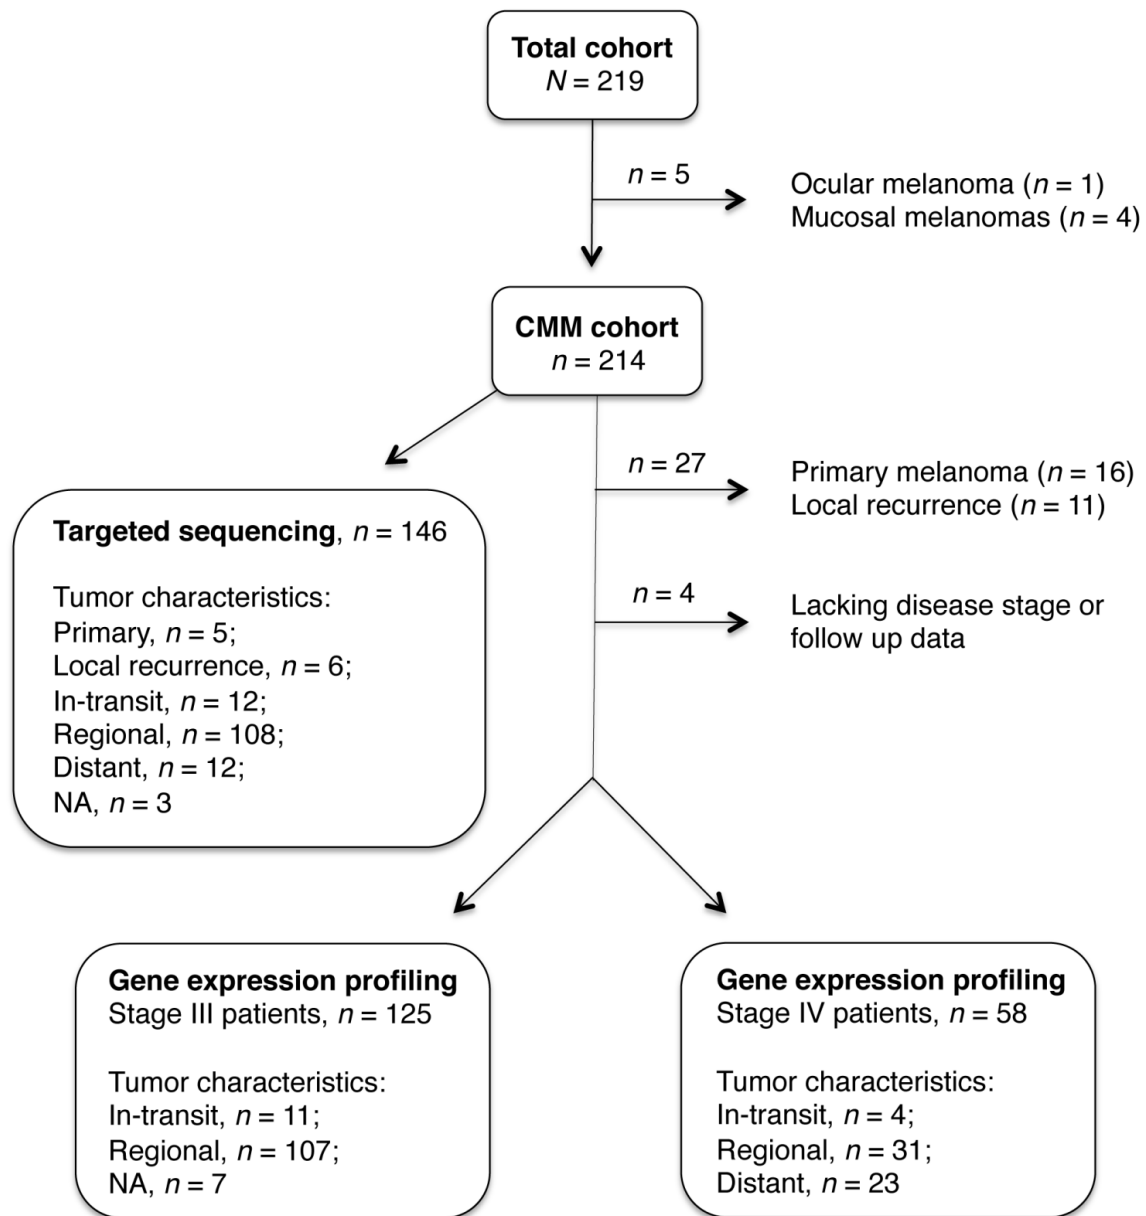

### Supplementary Figure 3

Consort diagram for melanoma patients included in the present study. In total 219 melanoma specimens were subjected to gene expression profiling, whereas only the cutaneous subset,  $n=214$ , was considered in subsequent analyzes. Deep targeted sequencing was performed on 146 melanoma samples.

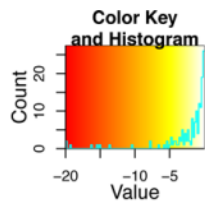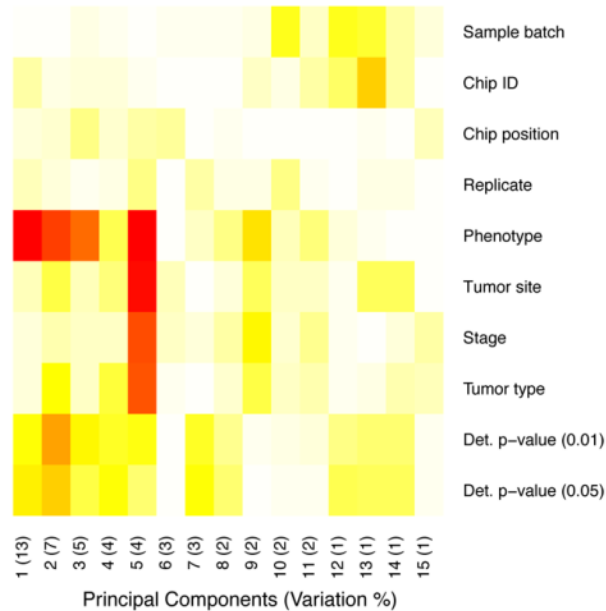

### Supplementary Figure 4

PCA was applied to control that the variation in the gene expression data was due biological factors and not systematic experimental artifacts. Samples were projected onto PCs (top 15 PCs) and further correlated to the sample annotations. Technical factors to be evaluated included sample batch (plate), chip id (hybridization batch), chip position and any differences found among the biological replicates. Biological and clinical factors included gene expression phenotypes, tumor site, disease stage, tumor type and the number of active genes as counted by probes with detection p-values (Det. p-value) less than 0.01 or 0.05 for each sample.



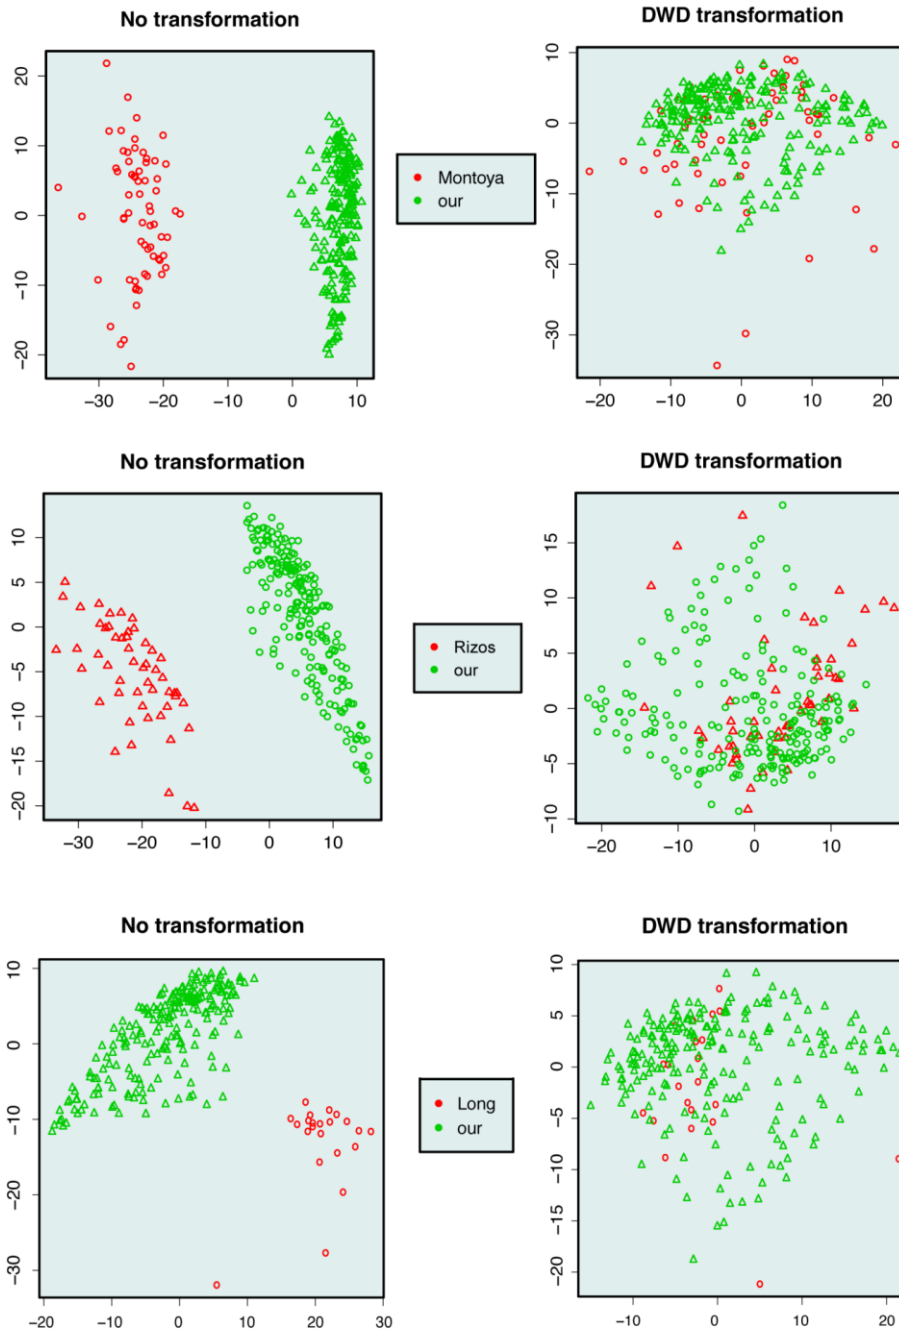

### Supplementary Figure 5

Visualization of potential sample source bias after pairwise merging of datasets using inSilicoMerging (R package) calling DWD adjustment. The DWD adjustment was performed using common centroid genes across the itemed datasets (Our/Rizos, 260 genes; Our/Long, 281 genes; Our/Ulloa-Montoya: 220 genes).
